1 **Biodiversity effects on seedling biomass growth are modulated by light environment across**  
2 **functional groups**

3

4 Krishna Anujan<sup>1\*</sup>, Alisha Shabnam<sup>2</sup>, Irfan Ali<sup>2</sup>, G Ashok Kumar<sup>2</sup>, Mahesh Sankaran<sup>3</sup>, Meghna  
5 Krishnadas<sup>4</sup>, Shahid Naeem<sup>1</sup>

6 <sup>1</sup>Department of Ecology, Evolution and Environmental Biology, Columbia University in the City  
7 of New York, New York, United States, 10025

8 <sup>2</sup>Jawaharlal Nehru Rajkeeya Mahavidyalaya, Port Blair, Andaman and Nicobar Islands, India  
9 744101

10 <sup>3</sup>Ecology and Evolution Group, National Centre for Biological Sciences, Bengaluru, India  
11 560065

12 <sup>4</sup>Council Of Scientific and Industrial Research-Centre for Cellular and Molecular Biology,  
13 Hyderabad, India 500007

14

15 **Abstract**

- 16 1. Tree biodiversity has the potential to ensure consistency in the functioning of forest  
17 ecosystems, not just over space, but over long-timescales by maintaining composition  
18 through recruitment. However, for continued buffering in the face of global  
19 environmental change, the sensitivity of biodiversity-ecosystem functioning relationships  
20 to heterogeneous environments needs to be understood.
- 21 2. Seedling recruitment in carbon-rich tropical forests is a result of biotic and abiotic drivers  
22 but their combined outcomes at the community-level remain poorly understood.

23           Although biodiversity in seedling communities can potentially increase their growth and  
24           biomass accumulation, abiotic drivers like light can alter this effect through divergent  
25           effects on constituent species and functional groups. In forests with high baseline  
26           heterogeneity in microclimates, these processes can enhance or constrain regeneration.

27       3. We tested the effects and interactions between species richness and canopy cover on the  
28           growth of seedling communities consisting of tropical broad-leaved evergreen and  
29           deciduous forest species using a fully crossed manipulated experiment in the Andaman  
30           Islands, India and compared these with field observations from a long-term forest plot in  
31           the same landscape.

32       4. We show that in the critical seedling establishment phase, species richness and light  
33           increase community biomass independently. Accounting for variation across species,  
34           individual species on average accumulated more biomass in communities with both  
35           higher light and higher diversity.

36       5. We also show that overyielding in species rich communities fits expectations from a  
37           model of complementarity with non-random overyielding than selection or spatial  
38           insurance effects.

39       6. *Synthesis* Taken together, our results show that the potential for biodiversity to increase  
40           ecosystem functioning in seedling communities is modulated by light. Further  
41           understanding on the interaction of biodiversity with multiple abiotic drivers and their  
42           effect on regeneration dynamics is crucial for predicting future ecosystem functioning.

43       **Keywords:** biodiversity, ecosystem functioning, tropical forests, overyielding,  
44       environmental heterogeneity

45

## 46 **Introduction**

47

48 Diverse forests consistently store more carbon than low diversity stands, but these ecosystem  
49 functions can be destabilised by changing environments is less understood (Ammer, 2019;  
50 Hutchison et al., 2018). At global and regional scales, higher tree diversity in forests is  
51 associated with greater productivity and higher contribution towards reducing atmospheric  
52 carbon (Liang et al., 2016; Osuri et al., 2020). However, with global environmental change  
53 increasing spatial and temporal environmental heterogeneity and driving compositional shifts,  
54 the future of forest-associated carbon storage remains uncertain (Feeley et al., 2011). In forested  
55 ecosystems, where large, long-lived trees have disproportionate contributions to biomass,  
56 productivity and associated ecosystem functions, future functioning depends on mortality and  
57 recruitment processes that shape community composition (Bunker et al., 2005). Although the  
58 responses of tree mortality to global environmental change are actively studied, recruitment  
59 processes have received relatively less attention in this context (but see Zhao et al., 2018).  
60 Understanding the importance of diversity to the community function of recruited tree  
61 communities under heterogenous environments is crucial for understanding and predicting the  
62 future of ecosystem functioning under scenarios of co-occurring environmental change and  
63 biodiversity loss.

64 The contribution of species diversity to ecosystem functioning under varied environmental  
65 conditions depends on how these conditions affect species performance. Diverse communities  
66 could have higher yield compared to monocultures either due to increased probability of  
67 selecting species that are high yielding across all conditions (selection effect), higher yield across  
68 all species in mixtures across all conditions (complementarity), each species performing better in

69 a suitable condition (spatial insurance), or differences in species yield but species overyielding in  
70 mixtures (complementarity with non-random overyielding) (Isbell et al., 2018). Trait differences  
71 between species and their performance under different conditions can therefore contribute  
72 significantly to the biodiversity effect, with larger spatial heterogeneity requiring higher species  
73 richness to maintain biodiversity (Thompson et al., 2018, 2021). Tests of these basic theoretical  
74 frameworks have mostly involved grassland communities with annuals or short-lived perennials.  
75 On the other hand, tropical forests store roughly 55% of terrestrial carbon with 56% of this  
76 stored in live biomass (Badgley et al., 2019; Pan et al., 2011). In these forests with long-lived  
77 species, the relative importance of diversity mechanisms, fine-scale environmental heterogeneity  
78 and high species richness remains unknown.

79 Intraspecific competition plays an integral role in structuring seedling communities and  
80 neighbourhood biodiversity can therefore increase growth. Studies with tropical tree species  
81 show that species richness and functional diversity in communities has the potential to increase  
82 the relative growth rate of individual seedlings and cause overyielding in communities (Kuptz et  
83 al., 2010; Sapijanskas et al., 2013; Shen et al., 2021; Van de Peer et al., 2018). Seedling diversity  
84 in the neighbourhood can alter seedling root traits directly, altering resource niches and  
85 acquisition patterns, and increasing growth at the community level (Madsen et al., 2020).  
86 However, seedling competition occurs in an environmental context for limiting resources, and  
87 the outcomes of interspecific interactions can change as the environment varies (Butterfield &  
88 Callaway, 2013). Biodiversity can therefore increase spatial and temporal insurance, leading to  
89 more consistent growth (lower variation over time), and higher biomass accumulation compared  
90 to single-species stands (Hutchison et al., 2018; Isbell et al., 2018; Tuck et al., 2016).

91 In diverse forests, light differentially affects growth across functional groups of tree seedlings,  
92 potentially structuring local communities and affecting standing biomass along natural gradients.  
93 As a result of pervasive light competition in forest understories, seedlings respond to increased  
94 light intensity with increased growth (Kuptz et al., 2010; Lu et al., 2021; Sangsupan et al., 2021;  
95 Sovu et al., 2010). Fundamentally, growth plasticity and the ability to utilize increased light is  
96 mediated by species identity or functional identity (Kuptz et al., 2010; Tomlinson et al., 2014;  
97 Tripathi et al., 2020). Deciduous species grow faster under increased light conditions while  
98 evergreen species have slower growth and are sensitive to drought in high light conditions  
99 (Tripathi et al., 2020). Mixed deciduous forests, a type of seasonally dry tropical forests, have  
100 both broad-leaved evergreen and deciduous species in the same canopy, leading to seasonal  
101 heterogeneity of microclimates in the forest floor. These differences can determine the  
102 distribution of seedlings in the understory; deciduous species in the canopy increase the  
103 abundance and diversity of light-demanding species in the understory by increasing light  
104 availability (Souza et al., 2014). Since evergreen and deciduous species are adapted to low and  
105 high light respectively, potential diversity effects under different light conditions are likely  
106 driven by mechanisms of spatial insurance. However, with increased tree mortality in tropical  
107 forests due to drought and extreme climatic events (Aleixo et al., 2019; Uriarte et al., 2019), light  
108 environments in the understory are potentially undergoing large-scale shifts, affecting both  
109 biodiversity and its effects on ecosystem functioning.

110 We experimentally assessed the combined influence of light and species diversity on the growth  
111 of tropical forest seedling communities and compared dynamics with field communities under  
112 natural regeneration in a high diversity tropical forest. We expected that (i) light would increase  
113 overall seedling growth and lead to overyielding in high light treatments compared to shade

114 treatments (ii) decreased intraspecific competition in mixed cultures would lead to higher  
 115 biomass with increasing species richness and combined with expectation (i), lead to higher  
 116 overyielding in high diversity, high light treatments (iii) light responses of evergreen and  
 117 deciduous species would be different, with evergreen species performing better under low light  
 118 and deciduous species performing better under high light environments, i.e., overyielding  
 119 through spatial insurance.

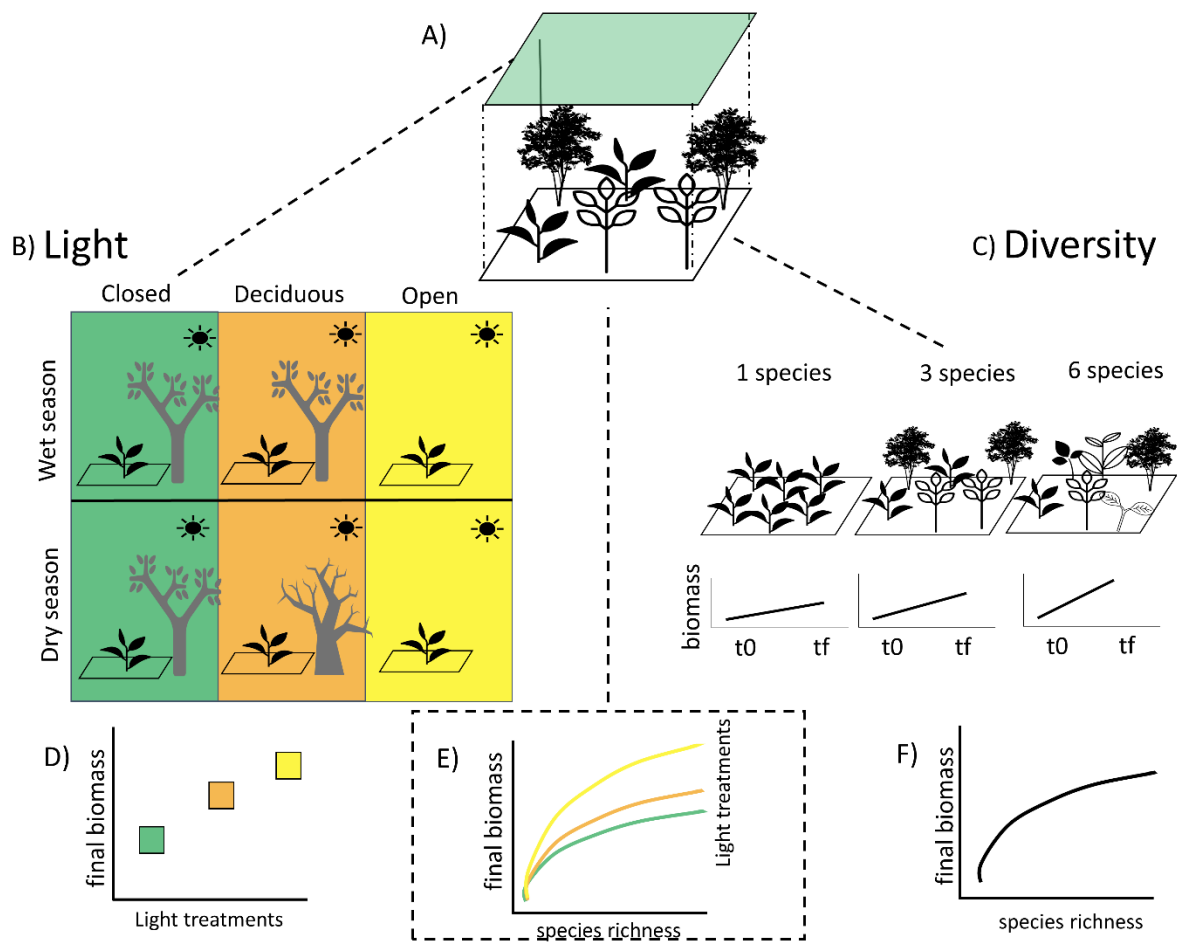

120

121 Figure 1: Schematic of experimental and expectations A) Experimental setup with fully crossed  
 122 light and diversity treatments B) Light treatments in detail – closed, deciduous and open canopy  
 123 treatments and with colour codes – in the wet and dry season and D) final biomass expectations  
 124 for each of these based on increased growth in the presence of light. C) Three levels of diversity

125 treatments – 1, 3 and 6 species and biomass expectations between initial and final communities  
126 and F) expectations for final biomass between the three treatments – an increasing, saturating  
127 curve. And finally, E) combined expectations for community biomass under the combined  
128 influence of light and diversity treatments; the influence of species diversity on growth is  
129 expected to be modulated by light conditions. Icons from The Noun Project.

## 130 **Methods**

131 We measured the combined influences of two key factors structuring forests – light and species  
132 diversity – through experimental methods and long-term data from a tropical forest landscape.  
133 The study was conducted in the Andaman Islands, India, an archipelago in the Bay of Bengal. It  
134 is part of the Indo-Burma biodiversity hotspot with high species diversity, high endemism and  
135 >80% forest cover. Many forests in the archipelago are mixed deciduous forests, where tropical  
136 evergreen and tropical deciduous tree species co-exist in the canopy. This has the potential to  
137 create heterogeneity in microclimate in the understory. A shadehouse experiment was conducted  
138 at the Silviculture Research nursery, Nayashahar, maintained by the Department of Environment  
139 and Forest, Andaman and Nicobar Islands. We matched the design of the experimental plots  
140 (plot size, range of species richness, abundance) and census methods closely with seedling plots  
141 at a permanent forest dynamics plot at Alexandra Island, about 10 km from the experiment site  
142 and with mixed deciduous forest type. This plot is part of the Long-term Ecosystem Monitoring  
143 Network (LEMoN) in India established to set baselines for forest dynamics and carbon storage  
144 across various biomes in India.

## 145 Experimental Methods

146 In a fully crossed experiment, we planted similarly sized evergreen and deciduous seedlings  
147 under 3 shade conditions (simulating an evergreen canopy that is closed throughout the year –  
148 “closed”, a deciduous canopy that is closed in the wet season and open in the dry season -  
149 “deciduous” and a consistently open condition – “open”) and in 3 levels of diversity (1 species, 3  
150 species and 6 species from a pool of 10 species) and measured growth for 1 year (Fig 1). Each  
151 treatment had 6 replicates each, totalling 54 plots. Each plot of 1 m x 1 m plot was planted with  
152 18 individually tagged seedlings belonging to 1, 3 or 6 species from a pool of 10 species in  
153 March 2019. Seedling plots of 1m<sup>2</sup> in the landscape contained an average of 16 seedlings and  
154 had a maximum of 7 species and the planting numbers were matched to these naturally occurring  
155 values. Experimental plots were set up using natural, well-mixed soil from an abandoned plot  
156 nearby and demarcated as regular rows using bamboo and other locally available building  
157 material. Over each plot, standard shade nets of 50% shade were used to cover the canopy at 6ft  
158 height to mimic either a closed canopy (closed throughout the year) or a deciduous canopy  
159 (closed in the wet season and open in the dry season) or they were left fully open throughout the  
160 year. The plots were arranged in regular rows with a spacing of 30 cm between adjacent plots  
161 and the 9 treatments were randomly distributed spatially among the 54 plots in the experiment.

162 We used seedlings of ten native forest tree species germinated by ANI forest department  
163 nurseries from seeds collected from nearby forests and for the purpose of replanting into  
164 selectively logged forests in the area. Six common species – 3 evergreen (*Dipterocarpus*  
165 *griffithii*, *Myristica andamanica* and *Mangifera andamanica*) and 3 deciduous (*Terminalia*  
166 *procera*, *Pterocarpus dalbergioides* and *Planchonia valida*) were chosen as the primary  
167 experimental species to make up the monocultures, while the other 4 species (*Artocarpus*  
168 *chaplasha*, *Diospyros sp.*, *Planchonella longipetiolata*, *Walsura sp.*) were planted in a few of the



169 3 and 6 species plots, to increase variation in species combinations in polycultures. For the 6  
170 primary species, monocultures were planted under each of the 3 canopy treatments. Seedlings  
171 were planted into the experiment when approximately 30 cm tall and within the height range in  
172 which these are usually replanted into forests. During transplanting, we removed the plants from  
173 the potting soil and measured root length, shoot length, basal area and total biomass, allowing us  
174 to create allometric equations of this life history stage. Eighteen individually tagged seedlings  
175 were planted into each plot in a random order but with equal spacing, 15 cm apart. After  
176 transplanting, we watered the plots for two weeks to reduce mortality specifically from  
177 transplanting. Other than weeding every month to maintain planting conditions, the plots were  
178 left unmanaged until the end of the experiment.

179 Two months after replanting, we initiated monthly censuses of the plots for 11 iterations. During  
180 each census, the height and basal area of every tagged individual seedling was measured. Height  
181 of the seedlings were measured using a standard measuring tape (carpentry tape) with an  
182 accuracy of 1 mm. Basal area of seedlings was measured using an Insize digital calliper with an  
183 accuracy of 0.01 mm. We report values from the final census, conducted in June 2020  
184 throughout this study.

### 185 Observational data

186 Seedling data from long-term plots with comparable species composition and microclimate  
187 heterogeneity in the landscape were analysed to validate experimental results. Under the LEMoN  
188 network, a 1-hectare long-term monitoring plot was set up at Alexandra Island in the Andaman  
189 archipelago. This site is in a mixed deciduous forest with no recent logging history and protected  
190 as part of the Mahatma Gandhi Marine National Park. Within the 1 ha plot, 25 seedling plots of 1  
191 m<sup>2</sup> have been set up on a uniform grid covering the extent of the plot. Within these subplots,

192 naturally regenerating seedlings are tagged, identified to the best possible degree and measured  
193 at monthly intervals. For comparing the light environments of the 25 different seedling plots, the  
194 canopy cover at each location was measured in December 2020, using a Forestry Suppliers  
195 Spherical Crown Densiometer, Convex Model A. At each seedling plot, the percent of canopy  
196 cover was calculated as the number of grid cells in the densiometer with canopy cover as an  
197 average over four replicate measures. Since much of the canopy cover in these plots is  
198 determined by the upper canopy where dynamics are slow, these light environments were  
199 assumed to be stable through the years of measurements.

200 Data on basal diameter and height of individual seedlings in these plots measured using similar  
201 equipment and methods as the experiment from three censuses done in June 2016, 2017 and  
202 2018 were used for comparison. Height was measured for all individuals in the seedling plot,  
203 while basal diameter was measured only for seedlings with height > 1m. For those instances  
204 where basal area was not recorded as part of monitoring protocol, basal area was calculated as a  
205 function of height using a fit for basal area to height from experimental communities. The  
206 allometric equation was  $basal\ diameter = 2.34 + 0.08 * height$ . Being under natural  
207 regeneration, the abundance, species richness and species composition varied across these plots.  
208 Over the three censuses, 585 seedlings were recorded, out of which 310 were unique individuals,  
209 while the rest were repeated encounters. Gaps in species IDs within the data were filled to the  
210 best possible extent using other information in the data sheet – like local names and remarks, but  
211 unidentified individuals with no further information were considered as a single species to avoid  
212 overcounting of richness. 254 of these individuals remained unassigned to species. Identified  
213 species belonged to genera that were used in the manipulated experiment, including *Myristica*  
214 *spp.*, *Terminalia bialata*, *Diospyros spp.*, *Dipterocarpus spp.*, and *Planchonia andamanica*.

215

216 Statistical methods

217 All statistical analyses were performed in R with R Studio (R Core Team 2020). For both  
218 experimental communities and field communities, we analysed the effects of experimental  
219 treatments of light and species richness on basal area and height using generalized linear models  
220 using the *lme4* package. To avoid the confounding effects of differential survival on total final  
221 biomass, we modelled treatment effects on the mean values of surviving individuals in the  
222 experiment (n=651) and on observed individuals in the field. Mean basal area and height being  
223 continuous, non-zero variables were modelled with gamma errors for continuous, non-zero  
224 variables, and because it best fit the distribution.

225 For the final communities, we assessed the degree of overyielding with species richness and the  
226 relative contribution of complementarity and selection effects using methodology from Loreau  
227 M. & Hector. A., 2001. We used data from the tenth census of the experiment as one of the  
228 monocultures (of *D. griffithii*) had all died by the last census. We used 49 of 54 replicates for this  
229 analysis, excluding mixed communities planted with species for which monocultures were not  
230 planted in the experiment (see above section). For each species, we calculated the average basal  
231 area in a monoculture across all three light treatments ( $M$ ). We calculated relative yield ( $\Delta Y$ ) in  
232 mixed communities as the difference of the observed yield ( $Y$ ) from the expected simple sum.  
233 Further, for each plot, we partitioned this difference into selection effects ( $cov(\Delta RY, M)$ , where  
234  $\Delta RY = Y/M - 1/N$ ) and complementarity effects ( $N\overline{\Delta RY\overline{M}}$ ), where  $N$  is the planted species  
235 diversity.

236 For observed communities on field, we modelled total basal area and height of individuals as a  
237 generalized linear mixed effects model with a gamma family of errors. We modelled each of  
238 these with separate quadratic models of species richness and canopy openness, with intercepts  
239 allowed to vary with the year of observation. We compared models with the linear only model  
240 (without the quadratic term) using AIC values.

241 All figures were created using *ggplot2* and *sjPlot*.

## 242 **Results**

### 243 Growth at the community level

244 Seedlings in experimental communities with greater species richness and greater light levels  
245 accumulated more biomass on average. Individual wet weight at the initial time point was more  
246 strongly associated with basal diameter than height (linear model for weight adjusted  $R^2$  with  
247 height=0.26, basal diameter=0.40). Mean basal area in the plant community, indicative of  
248 biomass, significantly increased with increasing levels of light and species richness; the 6 species  
249 treatment and the deciduous canopy treatment had significantly higher mean basal area than the  
250 closed, monocultures (Fig 2). Mean height of the seedlings, however, was only influenced by  
251 light; the deciduous treatment significantly increased mean height, while other treatments were  
252 not significantly different from the closed canopy monocultures (Fig 2). Moreover, there were no  
253 significant interaction effects of light and species richness treatments on either mean basal area  
254 or mean height of the seedlings (Fig 2). The differences between communities also persisted  
255 through time when analysed at the monthly timescale (repeated measures ANOVA, Fig S2).  
256 More trivially, regardless of treatment, higher values of final abundance were strongly associated  
257 with higher mean basal area and mean height in these communities (Fig 2). Summed across all

258 individuals in a 1m<sup>2</sup> plot, total height and basal area in final communities were highly correlated  
 259 (Pearson's correlation coefficient  $r=0.96$ ). The survival of seedlings in plots was not significantly  
 260 predicted by either planted species richness or by canopy treatment, but communities with higher  
 261 proportion of evergreen species had significantly lower survival at the end of the experiment (Fig  
 262 S1).  
 263

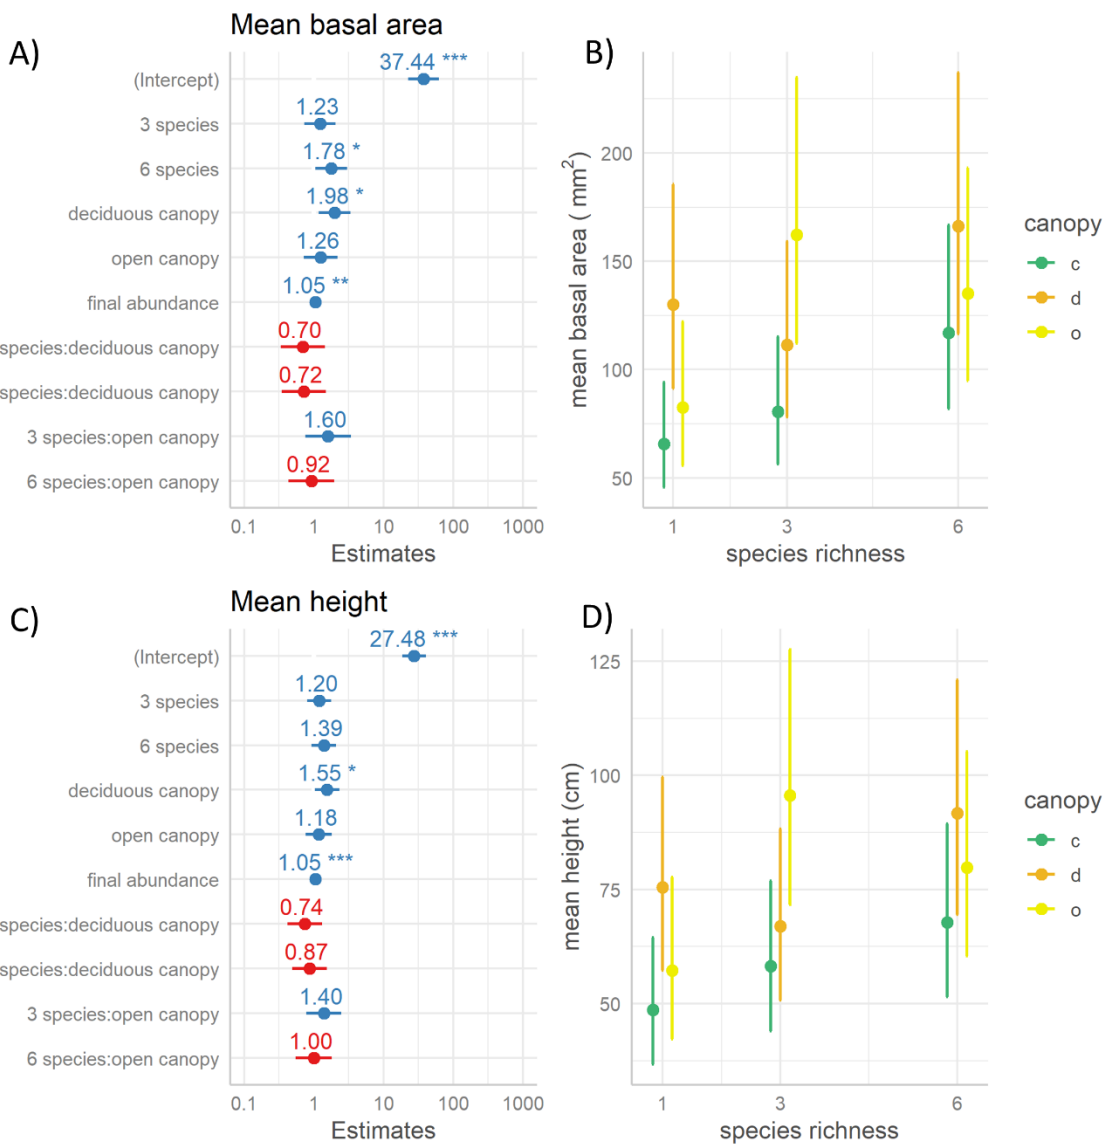

264

265 **Figure 2:** Generalized linear model of mean basal area and mean height of a seedling in a 1m x  
266 1m plot in the experiment. For mean basal area, deviance is 12.96,  $df=47$ ,  $p=0.999$ ,  $R^2=0.41$ . For  
267 mean height, deviance =8.24,  $df=47$ ,  $p=1$ ,  $R^2=0.48$ . For mean basal and mean height in a  
268 community A) and C) show model estimates of the parameters, B) and D) show model  
269 predictions for species richness and canopy treatments. Colour codes for canopy treatment,  
270 c=closed, d=deciduous and o=open treatments as specified in Fig1.

271

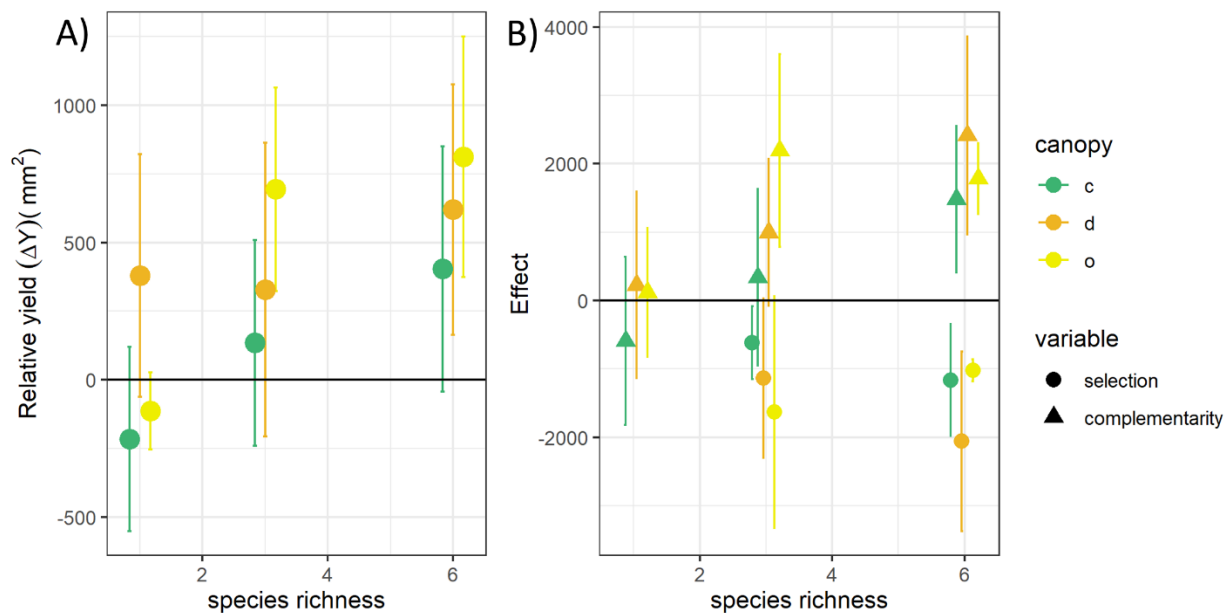

272

273 **Figure 3:** Relative contributions of complementarity and selection effect to relative yield ( $\Delta Y$ ) of  
274 multispecies communities. A) Plot of the relative yield ( $\Delta Y$ ) for different treatments, based on  
275 basal area measurements. B) The magnitude of complementarity and selection effects, as  
276 calculated by the Loreau-Hector method (details in methods). Points represent means and errors  
277 bars represent 95% confidence intervals.

278

279 Species richness in communities increased overyielding and complementarity effect and  
280 decreased the magnitude of selection effect across light environments (Fig 3). At the end of 10  
281 months of the experiment, observed total basal area in many plots was higher than from the  
282 expectation from monoculture averages; relative yield was largely positive. The relative yield  
283 increased with both light and diversity treatments; two-way ANOVA of observed – expected  
284 total basal area was significant for both species richness treatments ( $F=13.6$ ,  $df=1$ ,  $p<0.001^{***}$ )  
285 and canopy treatments ( $F=3.4$ ,  $df=2$ ,  $p=0.04^*$ ). Further, the effect of complementarity increased  
286 and selection effect decreased with increasing species richness (Fig 3). At the highest level of  
287 species diversity, the six species treatment, the magnitude of complementarity effect across all  
288 light treatments in all communities were positive while selection effect was negative for all  
289 communities. The magnitude of the complementarity effect was significantly different across  
290 light and diversity treatments (two-way ANOVA: species richness  $F=24.23$ ,  $df=1$ ,  $p<0.001^{***}$ ,  
291 canopy treatment  $F=3.74$ ,  $df=2$ ,  $p=0.03^*$ ), while selection effect was significantly different only  
292 with species richness ( $F=23.3$ ,  $df=1$ ,  $p<0.001^{***}$ , canopy treatment  $F=1.121$ ,  $df=2$ ,  $p=0.33$ ).

### 293 Predictors of growth at the individual level

294 Accounting for differences in species identity, individual seedlings that survived until the end of  
295 the experiment showed higher gain in basal diameter and height in mixed communities and in the  
296 deciduous treatment as compared to counterparts in closed monocultures ( $n=651$ ,  $RMSE=3.21$ ,  
297 marginal  $R^2=0.11$ ; Fig 4). However, the open canopy treatment was not significantly different  
298 from the closed treatment. Models also revealed significant negative interactions between the  
299 species richness and light treatments for individual seedling growth (Fig 4). Although species  
300 richness increased basal diameter and height across light treatments, this gain was lower in the  
301 deciduous treatment than in the closed treatment. Basal area and height at planting significantly

302 increased corresponding gains in these response variables within a year of the experiment (Fig  
 303 4).

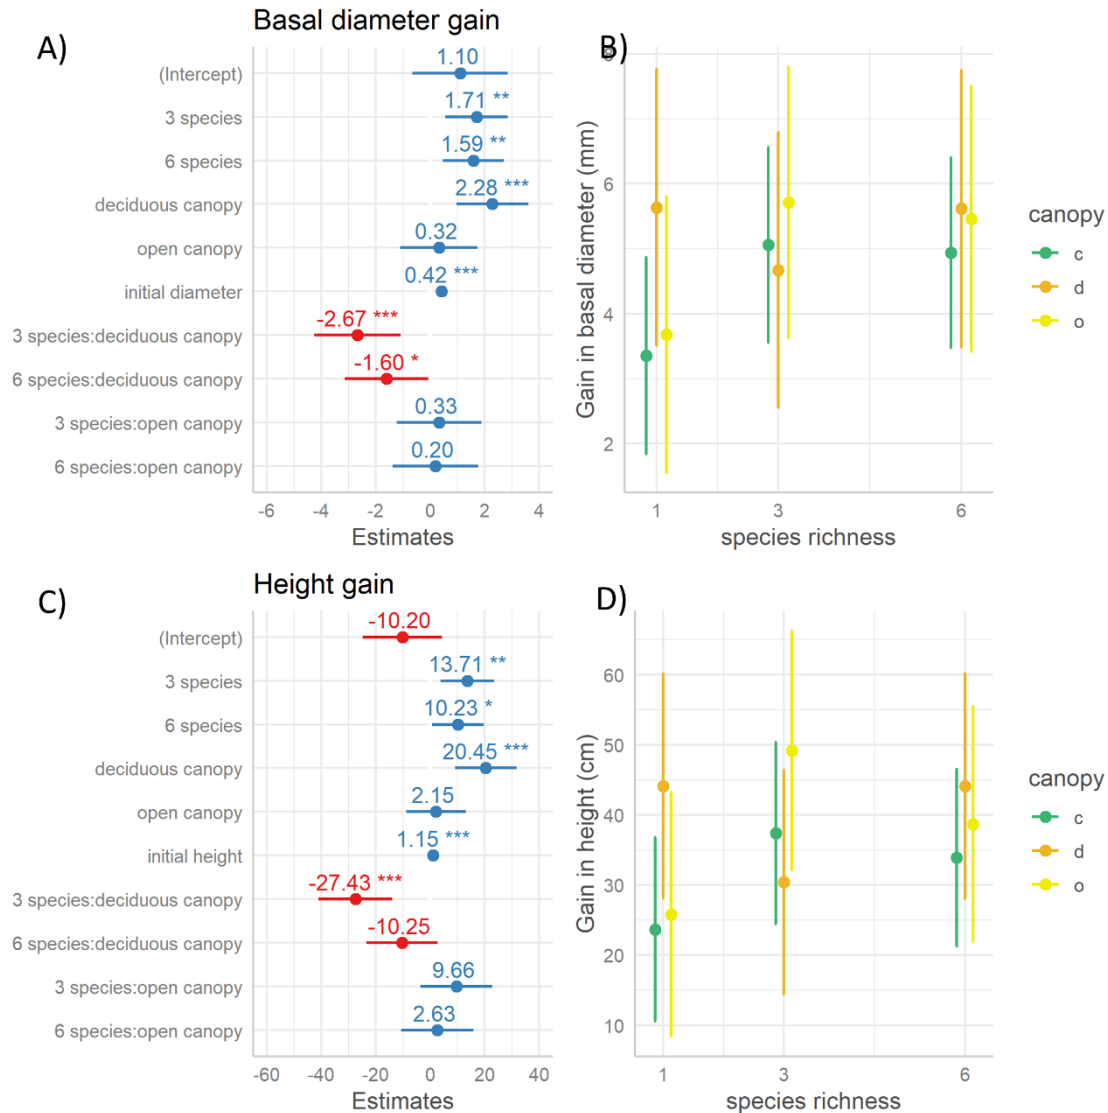

304

305 **Figure 4:** Linear mixed effects models for gain in basal diameter and height between the first  
 306 and the last census for individual seedlings; random slope model with variable slopes for each  
 307 species with canopy treatment. For basal diameter, deviance=3414, total  $R^2=0.44$ , fixed effect  
 308  $R^2=0.16$ ; for height, deviance=6200, total  $R^2=0.50$ , fixed effect  $R^2=0.29$ . For basal diameter and



309 height respectively, A) and C) represent estimated effects of different predictors, B) and D) show  
 310 predicted responses from the model for species richness and canopy conditions

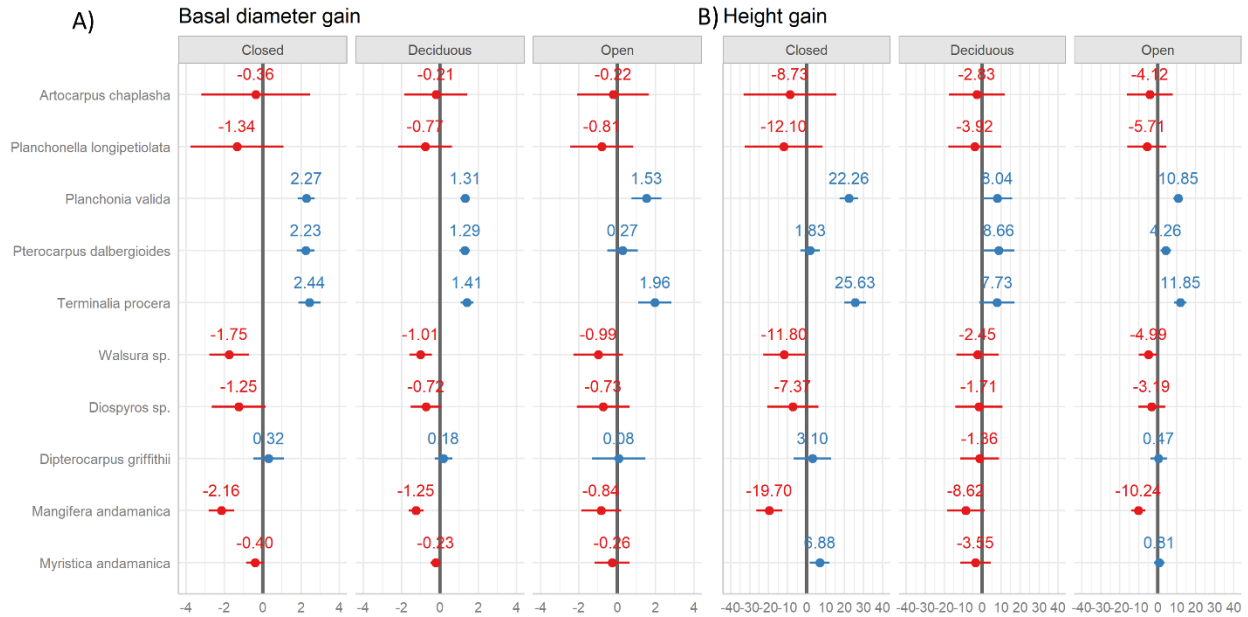

311

312 **Figure 5:** Random slopes of species under different canopy conditions; A) shows random effects  
 313 for each species for gain in basal diameter and B) for height gain. The top six species represent  
 314 fast-growing, deciduous species, followed by slower growing, evergreen species towards the  
 315 bottom.

316

317 Individual growth varied with species in the experiment and under different canopy conditions,  
 318 but the differences remained consistent across light treatments. The model with species specific  
 319 slopes, varying with canopy, had the lowest AIC, lower than the random intercept model ( $\Delta AIC$   
 320 (for  $df=17$  and  $df=12$ ) = 2.05). All other models - with no random effects and with only random  
 321 effects – performed much worse. The response of biomass to species diversity and light  
 322 dependent on species identity; in the full model with species richness, canopy treatment and

323 slopes varying with species, the random effect of species on slopes was significant (SD of  
324 random effect species identity at closed canopy = 1.89; deciduous canopy = 1.09, open canopy =  
325 1.20, residual =3.26). Deciduous species – *T. procera*, *P. valida*, *P. dalbergioides* and the  
326 evergreen *D. griffithii* had higher than average growth rates, demonstrated by positive values of  
327 the random effect, while *Myristica andamanica* and *Mangifera andamanica* were slower  
328 growing species (Fig 5). These patterns were consistent between basal diameter and height.  
329 Moreover, these differences were consistent across light treatments, although starker under lower  
330 light.

331 Species functional identities affect total basal area and total height of the community. Although  
332 functional diversity levels were not fully replicated in the experimental design, the proportion of  
333 evergreen species in the community affected the final biomass across all experimental  
334 treatments. Overall, increased proportion of evergreen species was associated with lower total  
335 basal area and total height across different light treatments (Fig S3). In the open canopy  
336 treatment, however, a 0.3 proportional abundance of evergreen species had the highest total basal  
337 area and total height. Due to a lack of replication of this combination in the closed and deciduous  
338 treatments, further tests of this pattern are not possible.

### 339 Convergence with observational data

340 Higher values of biomass accumulation in seedling communities in observational plots was  
341 associated with higher species richness and canopy openness. For 25 plots across a range of light  
342 conditions and species richness, separate models of total basal area and height in seedling  
343 communities showed significant non-linear effects of canopy openness and species richness on  
344 these variables. AIC values of all quadratic models were lower than for models with linear terms  
345 alone; except for height and species richness, where there was no clear best-fit model (Table S1).

346 Total basal area in communities increased with species richness, but peaked at intermediate  
347 levels; for a model with observation year as a random effect, the positive linear and negative  
348 quadratic term were significant (RMSE=0.5, marginal  $R^2=0.99$ , Fig 6A). Total basal area had a  
349 quadratic relationship with canopy openness (RMSE=0.50, marginal  $R^2=0.89$ , Fig 6B).  
350 Similarly, total height of seedling communities was highest at intermediate openness; a quadratic  
351 model of canopy openness was significant (RMSE=0.49, marginal  $R^2=0.94$ , conditional  $R^2=0.99$ ,  
352 Fig 6D). However, a quadratic model of total height with species richness only showed marginal  
353 effect of the linear term of species richness (RMSE=0.51, marginal  $R^2=0.99$ , Fig 6C). Across all  
354 treatments, the values of total basal area and total height in the field observations were lower  
355 than the experimental communities, but total height was closer in magnitude (Fig 6).  
356

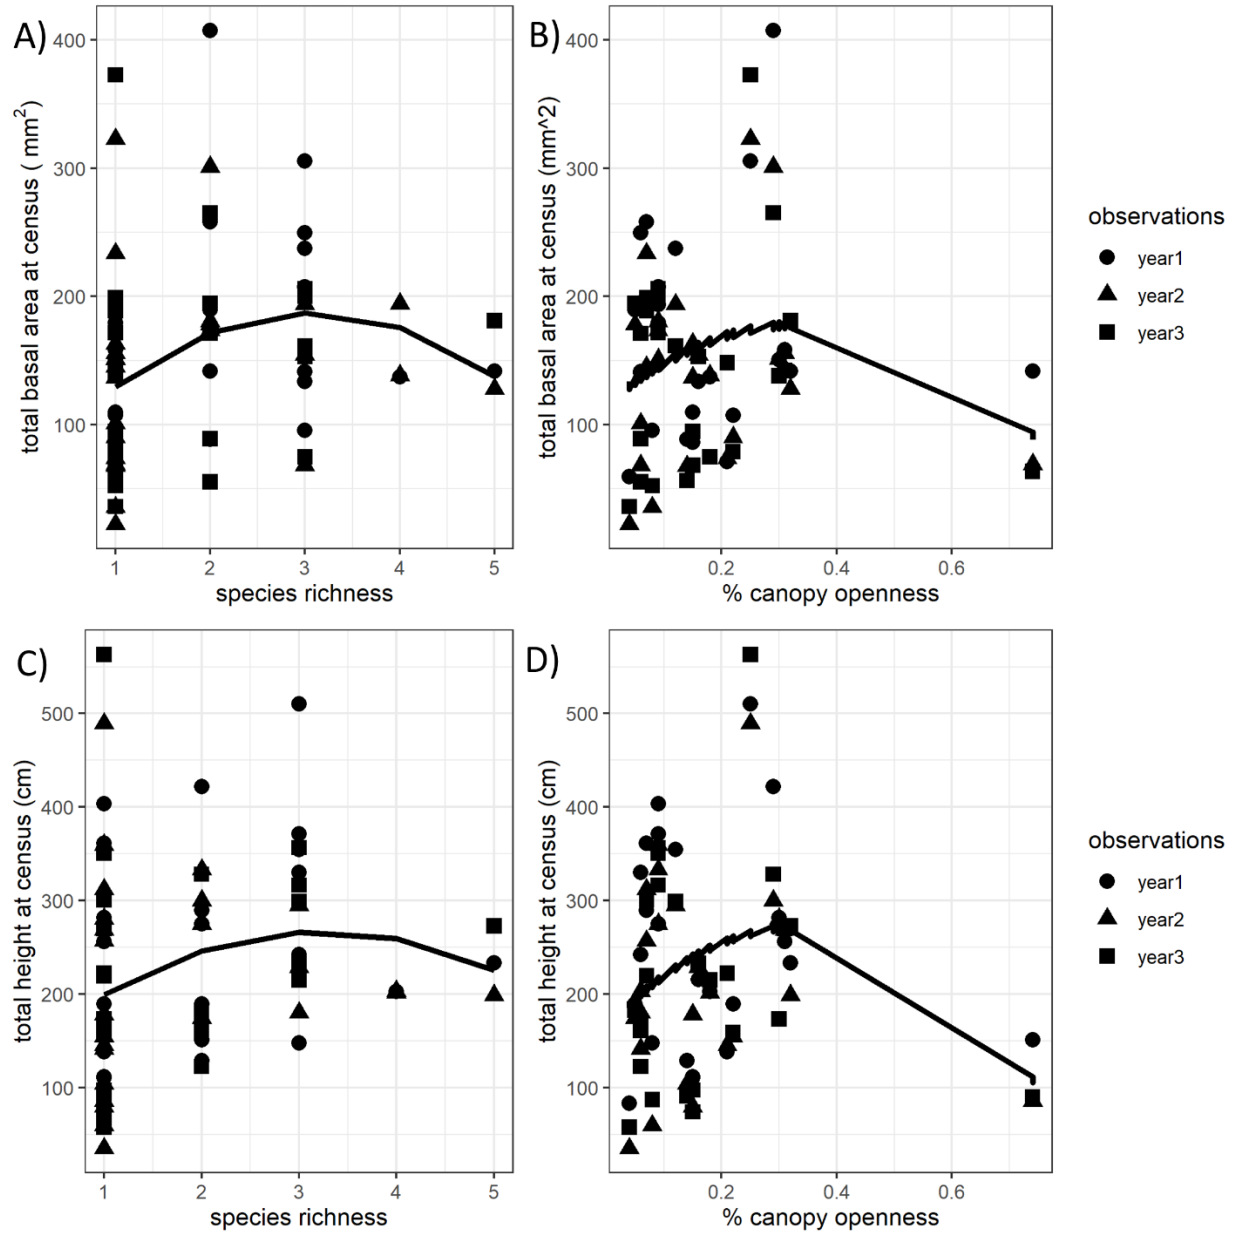

357

358 **Figure 6:** Observational data from long term plots. Generalised linear models of total basal area

359 as a function of A) species richness and B) canopy openness and total height as a function of C)

360 species richness and D) canopy openness.

361 **Discussion**

362

363 We found that light modulates the positive effect of species diversity on biomass accumulation in  
364 seedling communities. In even-aged, experimental tree seedling communities, representing the  
365 onset of regeneration, community growth was increased by both light levels and species  
366 diversity. Further, we show that this increase in growth at the community level is mirrored at the  
367 individual seedling level as well, even across species varying in functional types and growth  
368 rates. Ultimately, we show that complementarity with non-random overyielding likely drives  
369 biomass accumulation in seedling communities under combined biotic and abiotic influences in  
370 seedling communities. Taken together, our results demonstrate a critical need to integrate biotic  
371 and abiotic factors that structure diversity and ecosystem functioning. Our results lay  
372 groundwork to further understanding of future forest diversity and ecosystem functioning by  
373 disentangling processes that structure tree communities under regeneration.

374 Our results show that in the first and most crucial year of growth, biomass accumulation in  
375 seedling communities can be influenced independently and additively by light and species  
376 diversity. Seedling communities planted with higher species richness and under canopies with  
377 higher light had higher values of basal area and height after a year of the experiment (Fig. 2)  
378 (Sapijanskas et al., 2013; Shen et al., 2021). This demonstrates a potential additive influence of  
379 diversity and light on community level seedling growth. However, the increase in biomass was  
380 clearly observable only at the higher level of species richness or in the deciduous canopy  
381 treatment indicating that growth responses to these factors are not linear at the community level  
382 (Fig 2). Lending weight to experimental results, such non-linear responses of plot-level biomass  
383 to light were also observed in the naturally regenerating communities; although light increased  
384 standing biomass of seedlings, a single plot with the most open canopy had low values of  
385 biomass (Fig 6). Although there were clear biomass gains with species richness in experimental

386 plots, standing biomass increased weakly along the observed species diversity gradient (Fig 2,  
387 Fig 6). Under natural regeneration, species composition varies with microclimate conditions; for  
388 example, deciduous canopies with higher light have higher abundances of deciduous seedlings  
389 below them (Souza et al., 2014). Such niche partitioning by these functional groups and  
390 associated differences in growth rates could potentially explain weak relationships with species  
391 richness in natural communities.

392 We show that in seedling communities, overyielding with increasing richness can be explained  
393 by species complementarity rather than the increased probability of sampling faster growing or  
394 higher yielding species (Fig 3). Increasing diversity led to overyielding in communities (Fig 3),  
395 as expected from other studies on forest ecosystems (H. Pretzsch et al., 2015; Sapijanskas et al.,  
396 2013; Van de Peer et al., 2018). Beyond species richness, species functional composition  
397 influenced the survival and growth of communities (Fig S1, Fig S2) (Potvin & Gotelli, 2008;  
398 Salisbury & Potvin, 2015; Shen et al., 2020; Yang et al., 2013). However, despite considerable  
399 differences in growth rates among experimental species, inclusion of fast-growing species alone  
400 did not explain the observed increase in biomass in high-diversity treatments (Fig 3). In fact,  
401 selection effects decreased progressively from low to high species treatments, while  
402 complementarity effects increased (Fig 3). Such evidence about biodiversity-driven mechanisms  
403 in early life history stages of trees is lacking, but our results extend emerging evidence of  
404 complementarity in seedlings of forest species under constant environments (Bastias et al., 2021)  
405 and suggest that under heterogeneous environments, too, complementarity drives regeneration  
406 dynamics.

407 Deviating from purely competition-driven (complementarity) or probabilistic (selection) effects,  
408 our results indicate that the positive effect of biodiversity in heterogeneous environments can be

409 driven by complementarity with non-random overyielding (Isbell et al., 2018). Contrary to  
410 expectations of differential responses by functional groups across different light conditions,  
411 individuals across species, on average gained more biomass with higher light and higher species  
412 richness in the community (Fig 4). In other words, fast-growing, high yielding, deciduous  
413 species continued to outperform slower growing evergreen species across all conditions, but  
414 species diversity and light increased yield for all species, leading to higher biomass in high light,  
415 high diversity treatments (Fig 5). Light and diversity-mediated increases in individual growth  
416 across species suggests strong resource and light competition within these communities, in  
417 agreement with other studies on tree seedlings (Lu et al., 2021; Madsen et al., 2020; Promis &  
418 Allen, 2017).

419 Grassland species as well as mature trees show significant spatial and temporal insurance effects,  
420 which we did not detect on tree seedlings (Bunker et al., 2005; Isbell et al., 2018; and as  
421 reviewed in Loreau et al., 2021). This implies that although functional differences in mature trees  
422 might stabilise production through differential growth under heterogenous environments, these  
423 differences do not produce similar asynchrony in seedling communities. Instead, strong  
424 complementarity in seedling communities is a possible consequence of high intraspecific  
425 competition in these stages or growth suppression by plant enemies (Inman-Narahari et al.,  
426 2016). Our initial results indicate the need to explore these mechanisms further across diverse  
427 ecosystems and life history stages.

428 Broadly, we show that the potential for diversity to maintain ecosystem functioning is affected  
429 by changing environmental conditions. In the highest light conditions in our experiment, biomass  
430 at the community level was not improved significantly or consistently with increasing diversity  
431 (Fig 2). Moreover, for individual seedlings, the proportional gain with increasing light was

432 lower in high diversity treatments, indicating the limits of these positive outcomes, potentially  
433 due to other competitive interactions (Fig 4) (Rüger et al., 2011). These patterns may be driven  
434 by altered aboveground competition for light in high diversity communities, resulting from fast  
435 growth by some species and rapid vertical stratification observed during the experiment (Lu et  
436 al., 2021; Sapijanskas et al., 2014). Further, although light treatments in our study represent a  
437 strong driver of community structure in these forest understories, increased light could lead to  
438 both increased photosynthesis and increased water stress with consequent divergent effects on  
439 growth, that could interact with species diversity (O'Brien et al., 2017). While our results hold  
440 for both these processes acting together and represent realism to understand within-stand  
441 dynamics, these effects may be dissociated across forest stands and need further disentangling.  
442 More generally, multiple abiotic factors, including light, soil nutrients and soil moisture affect  
443 seedling dynamics in these forests. The strength of the biodiversity effect and the mechanisms  
444 through which it affects yield are likely to vary across forests structured by different  
445 environmental factors (García et al., 2018; Thompson et al., 2018, 2021).

446 Our findings have broad implications for understanding the interaction between multiple drivers  
447 and their influence on ecosystem functioning. Altered environmental conditions through global  
448 and local drivers combined with biodiversity loss across biomes have heightened the  
449 vulnerability of several ecosystem functions and services (Delzon et al., 2012; Heilpern et al.,  
450 2018). However, many mechanistic and simulation models that quantify forest futures continue  
451 to deal with single-species stands, simplified dynamics with light and focus largely on tree  
452 mortality than regeneration (Hans Pretzsch et al., 2015; Strigul et al., 2008). Our study adds to  
453 the understanding of future forest composition through by experimentally disentangling  
454 mechanisms that affect early growth stages (Shen et al., 2021; Uriarte et al., 2018). We show that



455 biodiversity effects on biomass gain in early growing stages of long-lived tree species can be  
456 modulated by abiotic factors. In the light of renewed understanding from this study, predictions  
457 of future composition and ecosystem functioning need to include community-based approaches  
458 and regeneration dynamics. Updated models for regeneration that include interactions between  
459 biotic and abiotic drivers and outcomes at the community level are crucial for predictions of  
460 ecosystem functioning in a changing world.

461

## 462 **Acknowledgements**

463 We acknowledge the support of the Department of Environment and Forest, Andaman and  
464 Nicobar Islands for conducting this work, under permit CCF/R&WP/9G(2)/Vol.XIV/741, and  
465 subsequent requests. This work was funded through a National Geographic Early Career Grant to  
466 KA. We are grateful to Ms. Nabanita Ganguly, Mr. Tarun Coomar, Ms. Deepa, Mr. Rashid and  
467 the staff at the Nayashahar Silviculture Nursery for permissions and logistical support. We also  
468 thank long-term field staff of the LEMoN plot in the Andamans – Anand James Tirkey, Sebian  
469 Horo and Ledu Kujur for their roles in data collection. This work was possible with community  
470 support at the Andaman Nicobar Environment Team. The authors would also like to thank Maria  
471 Uriarte for critical feedback during the design and analyses stages and Sarah Bruner and Pallavi  
472 Kache for writing support.

473

474 **References**

- 475 Aleixo, I., Norris, D., Hemerik, L., Barbosa, A., Prata, E., Costa, F., & Poorter, L. (2019).  
476 Amazonian rainforest tree mortality driven by climate and functional traits. *Nature Climate*  
477 *Change*, 9(5), 384–388. <https://doi.org/10.1038/s41558-019-0458-0>
- 478 Ammer, C. (2019). Diversity and forest productivity in a changing climate. *New Phytologist*,  
479 221(1), 50–66. <https://doi.org/10.1111/nph.15263>
- 480 Badgley, G., Anderegg, L. D. L., Berry, J. A., & Field, C. B. (2019). Terrestrial gross primary  
481 production: Using NIRV to scale from site to globe. *Global Change Biology*, 25(11), 3731–  
482 3740. <https://doi.org/10.1111/gcb.14729>
- 483 Bastias, C. C., Carvalho, B., Matesanz, S., de la Cruz, L., Bravo-Oviedo, A., Violle, C.,  
484 Valladares, F., & Benavides, R. (2021). Early positive biodiversity effects on total biomass  
485 in experimental tree seedling assemblages with and without water limitation. *Journal of*  
486 *Vegetation Science*, November, 1–13. <https://doi.org/10.1111/jvs.13096>
- 487 Bunker, D. E., Declerck, F., Bradford, J. C., Colwell, R. K., Perfecto, I., Phillips, O. L.,  
488 Sankaran, M., & Naeem, S. (2005). Species loss and aboveground carbon storage in a  
489 tropical forest. *Science (New York, N.Y.)*, 310(5750), 1029–1031.  
490 <https://doi.org/10.1126/science.1117682>
- 491 Butterfield, B. J., & Callaway, R. M. (2013). A functional comparative approach to facilitation  
492 and its context dependence. *Functional Ecology*, 27(4), 907–917.  
493 <https://doi.org/10.1111/1365-2435.12019>
- 494 Delzon, S., Bhaskar, R., & Bucci, S. J. (2012). *Global convergence in the vulnerability of forests*  
495 *to drought*. V, 4–8. <https://doi.org/10.1038/nature11688>

- 496 Feeley, K. J., Davies, S. J., Perez, R., Hubbell, S. P., & Foster, R. B. (2011). Directional changes  
497 in the species composition of a tropical forest. *Ecology*, *92*(4), 871–882.  
498 <https://doi.org/10.1890/10-0724.1>
- 499 García, F. C., Bestion, E., Warfield, R., & Yvon-Durochera, G. (2018). Changes in temperature  
500 alter the relationship between biodiversity and ecosystem functioning. *Proceedings of the*  
501 *National Academy of Sciences of the United States of America*, *115*(43), 10989–10994.  
502 <https://doi.org/10.1073/pnas.1805518115>
- 503 Heilpern, S. A., Weeks, B. C., & Naeem, S. (2018). Predicting ecosystem vulnerability to  
504 biodiversity loss from community composition. *Ecology*, *99*(5), 1099–1107.  
505 <https://doi.org/10.1002/ecy.2219>
- 506 Hutchison, C., Gravel, D., Guichard, F., & Potvin, C. (2018). Effect of diversity on growth,  
507 mortality, and loss of resilience to extreme climate events in a tropical planted forest  
508 experiment. *Scientific Reports*, *8*(1), 1–11. <https://doi.org/10.1038/s41598-018-33670-x>
- 509 Inman-Narahari, F., Ostertag, R., Hubbell, S. P., Giardina, C. P., Cordell, S., & Sack, L. (2016).  
510 Density-dependent seedling mortality varies with light availability and species abundance in  
511 wet and dry Hawaiian forests. *Journal of Ecology*, *104*(3), 773–780.  
512 <https://doi.org/10.1111/1365-2745.12553>
- 513 Isbell, F., Cowles, J., Dee, L. E., Loreau, M., Reich, P. B., Gonzalez, A., Hector, A., & Schmid,  
514 B. (2018). Quantifying effects of biodiversity on ecosystem functioning across times and  
515 places. *Ecology Letters*, *21*(6), 763–778. <https://doi.org/10.1111/ele.12928>
- 516 Kuptz, D., Grams, T. E. E., & Günter, S. (2010). Light acclimation of four native tree species in  
517 felling gaps within a tropical mountain rainforest. *Trees - Structure and Function*, *24*(1),

- 518 117–127. <https://doi.org/10.1007/s00468-009-0385-1>
- 519 Liang, J., Crowther, T. W., Picard, N., Wiser, S., Zhou, M., Alberti, G., Schulze, E.-D.,  
520 McGuire, D., Bozzato, F., Pretzsch, H., De-Miguel, S., Paquette, A., Hérault, B., Scherer-  
521 Lorenzen, M., Barrett, C. B., Glick, H. B., Hengeveld, G. M., Nabuurs, G.-J., Pfautsch, S.,  
522 ... Reich, P. B. (2016). Positive biodiversity–productivity relationship predominant in  
523 global forests. *Science*. <https://doi.org/10.1126/science.aaf8957>
- 524 Loreau, M., Barbier, M., Filotas, E., Gravel, D., Isbell, F., Miller, S. J., Montoya, J. M., Wang,  
525 S., Aussenac, R., Germain, R., Thompson, P. L., Gonzalez, A., & Dee, L. E. (2021).  
526 Biodiversity as insurance: from concept to measurement and application. *Biological*  
527 *Reviews*, 96(5), 2333–2354. <https://doi.org/10.1111/brv.12756>
- 528 Loreau M., & Hector. A. (2001). Partitioning selection and complementarity in biodiversity  
529 experiments. *Nature*, 412(6842), 72–76. <http://www.biology.mcgill.ca/faculty/loreau/>
- 530 Lu, X., Zang, R., Xu, Y., Yu, S., & Zhao, H. (2021). Effects of above-and below-ground  
531 interactions of plants on growth of tree seedlings in low-elevation tropical rainforests on  
532 Hainan Island, China. *Forests*, 12(7), 1–9. <https://doi.org/10.3390/f12070905>
- 533 Madsen, C., Potvin, C., Hall, J., Sinacore, K., Turner, B. L., & Schnabel, F. (2020). Coarse root  
534 architecture: Neighbourhood and abiotic environmental effects on five tropical tree species  
535 growing in mixtures and monocultures. *Forest Ecology and Management*, 460(December  
536 2019), 117851. <https://doi.org/10.1016/j.foreco.2019.117851>
- 537 O’Brien, M. J., Reynolds, G., Ong, R., & Hector, A. (2017). Resistance of tropical seedlings to  
538 drought is mediated by neighbourhood diversity. *Nature Ecology and Evolution*, 1(11),  
539 1643–1648. <https://doi.org/10.1038/s41559-017-0326-0>

- 540 Osuri, A. M., Gopal, A., Raman, T. R. S., Defries, R., Cook-Patton, S. C., & Naeem, S. (2020).  
541 Greater stability of carbon capture in species-rich natural forests compared to species-poor  
542 plantations. *Environmental Research Letters*, *15*(3). [https://doi.org/10.1088/1748-](https://doi.org/10.1088/1748-9326/ab5f75)  
543 [9326/ab5f75](https://doi.org/10.1088/1748-9326/ab5f75)
- 544 Pan, Y., Birdsey, R. A., Fang, J., Houghton, R., Kauppi, P. E., Werner, A., Phillips, O. L.,  
545 Shvidenko, A., Lewis, S. L., Canadell, J. G., Ciais, P., Jackson, R. B., Pacala, S., Mcguire,  
546 A. D., Piao, S., Rautiainen, A., & Hayes, D. (2011). A Large and Persistent Carbon Sink in  
547 the World's Forests. *Science*, *July*.
- 548 Potvin, C., & Gotelli, N. J. (2008). Biodiversity enhances individual performance but does not  
549 affect survivorship in tropical trees. *Ecology Letters*, *11*(3), 217–223.  
550 <https://doi.org/10.1111/j.1461-0248.2007.01148.x>
- 551 Pretzsch, H., del Río, M., Ammer, C., Avdagic, A., Barbeito, I., Bielak, K., Brazaitis, G., Coll,  
552 L., Dirnberger, G., Drössler, L., Fabrika, M., Forrester, D. I., Godvod, K., Heym, M., Hurt,  
553 V., Kurylyak, V., Löf, M., Lombardi, F., Matović, B., ... Bravo-Oviedo, A. (2015). Growth  
554 and yield of mixed versus pure stands of Scots pine (*Pinus sylvestris* L.) and European  
555 beech (*Fagus sylvatica* L.) analysed along a productivity gradient through Europe.  
556 *European Journal of Forest Research*, *134*(5), 927–947. [https://doi.org/10.1007/s10342-](https://doi.org/10.1007/s10342-015-0900-4)  
557 [015-0900-4](https://doi.org/10.1007/s10342-015-0900-4)
- 558 Pretzsch, Hans, Forrester, D. I., & Rötzer, T. (2015). Representation of species mixing in forest  
559 growth models: A review and perspective. *Ecological Modelling*, *313*, 276–292.  
560 <https://doi.org/10.1016/j.ecolmodel.2015.06.044>
- 561 Promis, A., & Allen, R. B. (2017). Tree seedlings respond to both light and soil nutrients in a

- 562 Patagonian evergreen-deciduous forest. *PLoS ONE*, 12(11), 1–15.
- 563 <https://doi.org/10.1371/journal.pone.0188686>
- 564 R ger, N., Berger, U., Hubbell, S. P., Vieilledent, G., & Condit, R. (2011). Growth strategies of  
565 tropical tree species: Disentangling light and size effects. *PLoS ONE*, 6(9).
- 566 <https://doi.org/10.1371/journal.pone.0025330>
- 567 Salisbury, C. L., & Potvin, C. (2015). Does Tree Species Composition Affect Productivity in a  
568 Tropical Planted Forest? *Biotropica*, 47(5), 559–568.
- 569 Sangsupan, H. A., Hibbs, D. E., Withrow-Robinson, B. A., & Elliott, S. (2021). Effect of  
570 microsite light on survival and growth of understory natural regeneration during restoration  
571 of seasonally dry tropical forest in upland northern Thailand. *Forest Ecology and*  
572 *Management*, 489(March), 119061. <https://doi.org/10.1016/j.foreco.2021.119061>
- 573 Sapijanskas, J., Paquette, A., Potvin, C., Kunert, N., & Loreau, M. (2014). Tropical tree diversity  
574 enhances light capture through crown plasticity and spatial and temporal niche differences.  
575 *Ecology*, 95(9), 2479–2492. <https://doi.org/10.1890/13-1366.1>
- 576 Sapijanskas, J., Potvin, C., & Loreau, M. (2013). Beyond shading: Litter production by  
577 neighbors contributes to overyielding in tropical trees. *Ecology*, 94(4), 941–952.  
578 <https://doi.org/10.1890/12-0337.1>
- 579 Shen, Z., Li, Y., Chen, Z., Xi, N., Luo, W., He, Q., Liu, S., Lin, W., Zhu, X., Fang, S., Wang, Y.,  
580 Li, B., & Chu, C. (2020). Species Identity and Initial Size Rather Than Neighborhood  
581 Interactions Influence Survival in a Response-Surface Examination of Competition.  
582 *Frontiers in Plant Science*, 11(August), 1–10. <https://doi.org/10.3389/fpls.2020.01212>

- 583 Shen, Z., Li, Y., Chen, Z., Zhang, B., Zhong, Y., Xi, N., Zhu, X., Lin, W., He, Q., Luo, W., Liu,  
584 S., Wei, W., Liu, H., Jiang, Y., Wang, W., Chen, D., Xiao, J., Tang, H., Li, B., ... Wang, Y.  
585 (2021). Neighborhood effects and environmental variables drive sapling growth in a young  
586 subtropical tree plantation. *Forest Ecology and Management*, 483(October 2020), 118929.  
587 <https://doi.org/10.1016/j.foreco.2021.118929>
- 588 Souza, F. M., Gandolfi, S., & Rodrigues, R. R. (2014). Deciduousness influences the understory  
589 community in a semideciduous tropical forest. *Biotropica*, 46(5), 512–515.  
590 <https://doi.org/10.1111/btp.12137>
- 591 Sovu, Tigabu, M., Savadogo, P., Odén, P. C., & Xayvongsa, L. (2010). Enrichment planting in a  
592 logged-over tropical mixed deciduous forest of Laos. *Journal of Forestry Research*, 21(3),  
593 273–280. <https://doi.org/10.1007/s11676-010-0071-6>
- 594 Strigul, N., Pristinski, D., Purves, D., Dushoff, J., Strigul, N., Pristinski, D., Purves, D., Dushoff,  
595 J., & Pacala, S. (2008). *Scaling from Trees to Forests : Tractable Macroscopic Equations*  
596 *for Forest Dynamics*. 78(4), 523–545.
- 597 Thompson, P. L., Isbell, F., Loreau, M., O’connor, M. I., & Gonzalez, A. (2018). The strength of  
598 the biodiversity-ecosystem function relationship depends on spatial scale. *Proceedings of*  
599 *the Royal Society B: Biological Sciences*, 285(1880), 1–9.  
600 <https://doi.org/10.1098/rspb.2018.0038>
- 601 Thompson, P. L., Kéfi, S., Zelnik, Y. R., Dee, L. E., Wang, S., De Mazancourt, C., Loreau, M.,  
602 & Gonzalez, A. (2021). Scaling up biodiversity-ecosystem functioning relationships: The  
603 role of environmental heterogeneity in space and time. *Proceedings of the Royal Society B:*  
604 *Biological Sciences*, 288(1946). <https://doi.org/10.1098/rspb.2020.2779>

- 605 Tomlinson, K. W., Poorter, L., Bongers, F., Borghetti, F., Jacobs, L., & Van Langevelde, F.  
606 (2014). Relative growth rate variation of evergreen and deciduous savanna tree species is  
607 driven by different traits. *Annals of Botany*, *114*(2), 315–324.  
608 <https://doi.org/10.1093/aob/mcu107>
- 609 Tripathi, S., Bhadouria, R., Srivastava, P., Devi, R. S., Chaturvedi, R., & Raghubanshi, A. S.  
610 (2020). Effects of light availability on leaf attributes and seedling growth of four tree  
611 species in tropical dry forest. *Ecological Processes*, *9*(1). [https://doi.org/10.1186/s13717-](https://doi.org/10.1186/s13717-019-0206-4)  
612 [019-0206-4](https://doi.org/10.1186/s13717-019-0206-4)
- 613 Tuck, S. L., O'Brien, M. J., Philipson, C. D., Saner, P., Tanadini, M., Dzulkifli, D., Godfray, H.  
614 C. J., Godoong, E., Nilus, R., Ong, R. C., Schmid, B., Sinun, W., Snaddon, J. L., Snoep, M.,  
615 Tangki, H., Tay, J., Ulok, P., Wai, Y. S., Weilenmann, M., ... Hector, A. (2016). The value  
616 of biodiversity for the functioning of tropical forests: Insurance effects during the first  
617 decade of the sabah biodiversity experiment. *Proceedings of the Royal Society B: Biological*  
618 *Sciences*, *283*(1844). <https://doi.org/10.1098/rspb.2016.1451>
- 619 Uriarte, M., Muscarella, R., & Zimmerman, J. K. (2018). Environmental heterogeneity and biotic  
620 interactions mediate climate impacts on tropical forest regeneration. *Global Change*  
621 *Biology*, *24*(2), e692–e704. <https://doi.org/10.1111/gcb.14000>
- 622 Uriarte, M., Thompson, J., & Zimmerman, J. K. (2019). Hurricane María tripled stem breaks and  
623 doubled tree mortality relative to other major storms. *Nature Communications*, *10*(1), 1–7.  
624 <https://doi.org/10.1038/s41467-019-09319-2>
- 625 Van de Peer, T., Mereu, S., Verheyen, K., María Costa Saura, J., Morillas, L., Roales, J., Lo  
626 Cascio, M., Spano, D., Paquette, A., & Muys, B. (2018). Tree seedling vitality improves



627 with functional diversity in a Mediterranean common garden experiment. *Forest Ecology*  
628 *and Management*, 409(December 2017), 614–633.

629 <https://doi.org/10.1016/j.foreco.2017.12.001>

630 Yang, X., Bauhus, J., Both, S., Fang, T., Härdtle, W., Kröber, W., Ma, K., Nadrowski, K., Pei,

631 K., Scherer-Lorenzen, M., Scholten, T., Seidler, G., Schmid, B., von Oheimb, G., &

632 Bruelheide, H. (2013). Establishment success in a forest biodiversity and ecosystem

633 functioning experiment in subtropical China (BEF-China). *European Journal of Forest*

634 *Research*, 132(4), 593–606. <https://doi.org/10.1007/s10342-013-0696-z>

635 Zhao, P., Xu, C., Zhou, M., Zhang, B., Ge, P., Zeng, N., & Liu, H. (2018). Rapid regeneration

636 offsets losses from warming-induced tree mortality in an aspen-dominated broad-leaved

637 forest in northern China. *PLoS ONE*, 13(4), 4–15.

638 <https://doi.org/10.1371/journal.pone.0195630>

639
